# Supplementary material for: Serum 25-hydroxyvitamin D Concentration Significantly Decreases in Patients with COVID-19 Pneumonia during the First 48 Hours after Hospital Admission
Source: MDPI journal article supplement (doi:10.3390/nu14122362), 2022-06-07
Supplement: s1 [file s1]

**Table S1:** The mean values of 25(OH)D of each patient during the monitoring period (day 0-4).

| Patient        | 25(OH)D Day 0 | 25(OH)D Day 1 | 25(OH)D Day 2 | 25(OH)D Day 3 | 25(OH)D Day 4 |
|----------------|---------------|---------------|---------------|---------------|---------------|
| Pacient 1 (M)  | 45,20         | 41,10         | 39,20         | 38,00         | 41,50         |
| Pacient 2 (M)  | 18,30         | 15,80         | 16,60         | 13,80         | 15,00         |
| Pacient 3 (M)  | 39,50         | 41,30         | 34,70         | 36,60         | 37,60         |
| Pacient 4 (M)  | 52,30         | 48,40         | 45,30         | 42,00         | 41,30         |
| Pacient 5 (M)  | 66,50         | 50,60         | 53,70         | 53,30         | 56,30         |
| Pacient 6 (M)  | 30,90         | 29,30         | 28,80         | 26,00         | 24,90         |
| Pacient 7 (M)  | 7,15          | 6,09          | 8,15          | 8,92          | 7,92          |
| Pacient 8 (M)  | 37,00         | 36,20         | 33,20         | 34,20         | 30,00         |
| Pacient 9 (M)  | 11,30         | 10,40         | 12,80         | 8,89          | 9,42          |
| Pacient 10 (M) | 42,40         | 42,90         | 38,80         | 36,70         | 38,80         |
| Pacient 11 (M) | 39,00         | 37,20         | 33,30         | 31,80         | 31,00         |
| Pacient 12 (M) | 30,00         | 24,00         | 20,70         | 25,80         | 26,90         |
| Pacient 13 (F) | 8,94          | 8,47          | 7,48          | 7,11          | 8,12          |
| Pacient 14 (F) | 26,80         | 20,30         | 20,10         | 20,50         | 21,20         |
| Pacient 15 (F) | 21,40         | 21,80         | 22,50         | 23,90         | 22,90         |
| Pacient 16 (F) | 32,70         | 26,30         | 25,10         | 26,00         | 22,10         |
| Pacient 17 (M) | 29,10         | 31,60         | 28,50         | 28,50         | 31,30         |
| Pacient 18 (M) | 5,23          | 5,38          | 4,70          | 5,34          | 5,21          |
| Pacient 19 (M) | 32,30         | 27,00         | 26,00         | 23,00         | 23,00         |
| Pacient 20 (M) | 31,50         | 27,30         | 24,20         | 26,50         | 25,00         |
| Pacient 21 (F) | 47,20         | 40,20         | 39,60         | 36,10         | 36,90         |
| Pacient 22 (F) | 21,00         | 18,40         | 16,80         | 13,90         | 14,00         |

**Abbreviations:** M=male; F=female; 25(OH)D=25-hydroxyvitamin D

**Table S2:** The mean values of CRP, IL-6, PCT and LD of each patient during the monitoring period (day 0-4).

| Patient        | CRP<br>Day 0 | CRP<br>Day 1 | CRP<br>Day 2 | CRP<br>Day 3 | CRP<br>Day 4 | IL-6<br>Day 0 | IL-6<br>Day 1 | IL-6<br>Day 2 | IL-6<br>Day 3 | IL-6<br>Day 4 | PCT<br>Day 0 | PCT<br>Day 1 | PCT<br>Day 2 | PCT<br>Day 3 | PCT<br>Day 4 | LD<br>Day<br>0 | LD<br>Day<br>1 | LD<br>Day<br>2 | LD<br>Day<br>3 | LD<br>Day<br>4 |
|----------------|--------------|--------------|--------------|--------------|--------------|---------------|---------------|---------------|---------------|---------------|--------------|--------------|--------------|--------------|--------------|----------------|----------------|----------------|----------------|----------------|
| Pacient 1 (M)  | 175,25       | 92,24        | 39,32        | 19,91        | 28,52        | 81,90         | 47,07         | 33,51         | 37,82         | 8,09          | 0,19         | 0,14         | 0,08         | 0,10         | 0,11         | 13,9<br>6      | 11,8<br>4      | 11,4<br>4      | 13,2<br>8      | 9,34           |
| Pacient 2 (M)  | 107,41       | 59,08        | 25,80        | 15,27        | 8,09         | 77,00         | 1,50          | 2,92          | 7,59          | 3,71          | 0,15         | 0,14         | 0,11         | 0,10         | 0,07         | 9,07           | 7,28           | 6,55           | 6,16           | 5,08           |
| Pacient 3 (M)  | 46,38        | 29,94        | 19,92        | 47,51        | 22,68        | 17,89         | 4,53          | 153,60        | 91,92         | 3,21          | 0,06         | 0,05         | 0,06         | 0,04         | 0,02         | 10,3<br>3      | 8,34           | 7,95           | 6,80           | 5,54           |
| Pacient 4 (M)  | 93,79        | 93,68        | 110,28       | 115,54       | 89,18        | 27,51         | 44,06         | 57,33         | 43,29         | 56,33         | 0,32         | 0,32         | 0,19         | 0,13         | 0,09         | 16,8<br>9      | 17,6<br>5      | 18,3<br>0      | 17,0<br>0      | 15,0<br>2      |
| Pacient 5 (M)  | 198,50       | 163,71       | 87,42        | 46,44        | 68,66        | 172,30        | 8,44          | 12,57         | 6,25          | 43,59         | 0,62         | 0,39         | 0,25         | 0,13         | 0,11         | 17,0<br>1      | 14,4<br>1      | 13,6<br>9      | 9,94           | 10,9<br>2      |
| Pacient 6 (M)  | 62,07        | 36,30        | 32,38        | 17,22        | 11,07        | 62,22         | 45,82         | 21,28         | 29,06         | 14,34         | 0,24         | 0,14         | 0,10         | 0,05         | 0,06         | 6,86           | 8,08           | 6,70           | 6,40           | 6,49           |
| Pacient 7 (M)  | 383,55       | 145,22       | 80,14        | 100,14       | 47,50        | 218,10        | 20,75         | 51,34         | 13,26         | 10,57         | 1,21         | 0,88         | 0,40         | 0,23         | 0,14         | 14,6<br>6      | 13,0<br>7      | 12,2<br>3      | 11,3<br>9      | 9,32           |
| Pacient 8 (M)  | 193,65       | 207,55       | 118,28       | 54,98        | 26,10        | 188,80        | 67,76         | 8,01          | 3,56          | 4,66          | 0,15         | 0,17         | 0,10         | 0,06         | 0,07         | 6,86           | 7,80           | 6,86           | 6,17           | 5,49           |
| Pacient 9 (M)  | 28,07        | 10,61        | 12,12        | 5,38         | 1,96         | 28,65         | 5,82          | 1,50          | 1,50          | 1,50          | 0,12         | 0,09         | 0,09         | 0,09         | 0,08         | 3,69           | 3,16           | 3,15           | 3,50           | 3,26           |
| Pacient 10 (M) | 218,72       | 142,14       | 57,06        | 40,54        | 18,91        | 228,50        | 39,08         | 15,69         | 68,57         | 19,74         | 0,20         | 0,16         | 0,11         | 0,07         | 0,06         | 5,66           | 4,97           | 4,25           | 4,25           | 3,76           |
| Pacient 11 (M) | 207,65       | 94,92        | 51,69        | 60,36        | 30,56        | 58,25         | 36,60         | 39,04         | 23,80         | 11,69         | 0,94         | 0,44         | 0,17         | 0,12         | 0,09         | 6,18           | 5,21           | 5,35           | 5,34           | 4,79           |
| Pacient 12 (M) | 193,82       | 94,21        | 65,23        | 164,04       | 195,25       | 60,87         | 18,43         | 166,10        | 317,40        | 6,43          | 0,19         | 0,09         | 0,08         | 0,18         | 0,29         | 8,43           | 8,75           | 11,9<br>7      | 15,8<br>4      | 15,4<br>1      |
| Pacient 13 (F) | 407,96       | 252,17       | 127,19       | 72,16        | 59,24        | 414,20        | 24,08         | 27,44         | 8,89          | 14,44         | 24,80        | 13,54        | 6,62         | 2,39         | 1,02         | 1,96           | 3,07           | 2,73           | 2,85           | 2,53           |
| Pacient 14 (F) | 91,23        | 84,72        | 131,78       | 174,80       | 98,85        | 17,88         | 87,51         | 80,96         | 44,04         | 2,79          | 0,06         | 0,04         | 0,05         | 0,04         | 0,05         | 6,55           | 5,47           | 7,00           | 7,92           | 6,18           |
| Pacient 15 (F) | 155,55       | 212,39       | 105,44       | 56,62        | 29,31        | 254,90        | 53,79         | 37,07         | 25,00         | 8,18          | 0,36         | 0,42         | 0,32         | 0,51         | 0,41         | 7,47           | 13,7<br>0      | 7,12           | 6,30           | 5,91           |
| Pacient 16 (F) | 147,80       | 67,51        | 28,49        | 15,61        | 8,60         | 62,06         | 5,53          | 2,41          | 3,23          | 6,61          | 0,03         | 0,05         | 0,02         | 0,02         | 0,02         | 6,70           | 4,28           | 4,18           | 3,63           | 4,25           |
| Pacient 17 (M) | 128,10       | 70,05        | 67,18        | 38,86        | 17,21        | 62,48         | 72,48         | 2415,00       | 1546,00       | 893,60        | 1,33         | 1,29         | 0,69         | 0,44         | 0,28         | 8,16           | 8,57           | 9,11           | 9,73           | 9,91           |
| Pacient 18 (M) | 170,03       | 133,72       | 44,99        | 21,79        | 13,57        | 62,72         | 12,26         | 8,85          | 9,65          | 4,62          | 10,05        | 9,85         | 4,47         | 2,05         | 1,08         | 3,95           | 6,34           | 5,61           | 7,88           | 5,61           |
| Pacient 19 (M) | 112,51       | 54,92        | 45,20        | 74,43        | 70,39        | 33,57         | 11,79         | 229,40        | 181,50        | 87,36         | 0,39         | 0,21         | 0,23         | 0,26         | 0,26         | 2,34           | 1,81           | 2,54           | 2,45           | 2,42           |
| Pacient 20 (M) | 475,85       | 401,30       | 152,88       | 70,35        | 52,46        | 1130,00       | 265,40        | 64,24         | 34,08         | 170,40        | 1,95         | 1,86         | 0,94         | 0,49         | 0,30         | 12,3<br>9      | 16,4<br>1      | 12,0<br>2      | 12,2<br>4      | 12,2<br>5      |
| Pacient 21 (F) | 114,47       | 117,42       | 118,66       | 81,39        | 54,42        | 203,40        | 126,40        | 93,02         | 91,94         | 54,19         | 0,21         | 0,15         | 0,11         | 0,10         | 0,09         | 12,8<br>0      | 10,5<br>4      | 11,2<br>8      | 11,4<br>1      | 10,5<br>3      |
| Pacient 22 (F) | 292,40       | 255,25       | 97,91        | 41,25        | 28,09        | 134,70        | 13,48         | 20,14         | 35,67         | 49,05         | 0,38         | 0,26         | 0,15         | 0,13         | 0,10         | 12,7<br>7      | 13,4<br>9      | 12,2<br>3      | 11,8<br>1      | 10,4<br>3      |

**Abbreviations:** M=male; F=female; CRP=C-reactive protein; IL-6=Interleukin-6; PCT=Procalcitonin LD=Lactate dehydrogenase

**Table S3:** The mean values of neutrophils, lymphocytes, monocytes and NLR of each patient during the monitoring period (day 0-4).

| Patient        | Neutrophils<br>Day 0 | Neutrophils<br>Day 1 | Neutrophils<br>Day 2 | Neutrophils<br>Day 3 | Neutrophils<br>Day 4 | Lymphocytes<br>Day 0 | Lymphocytes<br>Day 1 | Lymphocytes<br>Day 2 | Lymphocytes<br>Day 3 | Lymphocytes<br>Day 4 | Monocytes<br>Day 0 | Monocytes<br>Day 1 | Monocytes<br>Day 2 | Monocytes<br>Day 3 | Monocytes<br>Day 4 | NLR<br>Day<br>0 | NLR<br>Day<br>1 | NLR<br>Day<br>2 | NLR<br>Day<br>3 | NLR<br>Day<br>4 |
|----------------|----------------------|----------------------|----------------------|----------------------|----------------------|----------------------|----------------------|----------------------|----------------------|----------------------|--------------------|--------------------|--------------------|--------------------|--------------------|-----------------|-----------------|-----------------|-----------------|-----------------|
| Pacient 1 (M)  | 4,04                 | 6,97                 | 7,29                 | 7,35                 | 11,25                | 1,21                 | 0,90                 | 1,00                 | 1,04                 | 0,80                 | 0,30               | 0,56               | 0,67               | 0,60               | 0,52               | 3,00            | 8,00            | 7,00            | 7,00            | 14,00           |
| Pacient 2 (M)  | 5,09                 | 8,14                 | 7,46                 | 7,10                 | 7,14                 | 0,84                 | 1,18                 | 1,55                 | 1,77                 | 1,51                 | 0,33               | 0,72               | 0,66               | 0,66               | 0,65               | 6,00            | 7,00            | 5,00            | 4,00            | 5,00            |
| Pacient 3 (M)  | 2,40                 | 2,57                 | 5,52                 | 5,33                 | 4,63                 | 1,84                 | 1,28                 | 1,92                 | 2,11                 | 2,25                 | 0,39               | 0,37               | 0,75               | 0,74               | 0,49               | 1,00            | 2,00            | 3,00            | 3,00            | 2,00            |
| Pacient 4 (M)  | 5,33                 | 8,30                 | 10,73                | 11,27                | 13,77                | 1,02                 | 0,88                 | 0,66                 | 0,72                 | 0,64                 | 0,31               | 0,43               | 0,49               | 0,53               | 0,50               | 5,00            | 10,00           | 18,00           | 16,00           | 22,00           |
| Pacient 5 (M)  | 10,76                | 4,87                 | 4,07                 | 5,73                 | 7,40                 | 0,76                 | 0,66                 | 0,47                 | 0,66                 | 0,91                 | 0,43               | 0,55               | 0,52               | 0,86               | 0,95               | 14,00           | 7,00            | 9,00            | 9,00            | 9,00            |
| Pacient 6 (M)  | 7,05                 | 16,03                | 13,16                | 11,25                | 10,08                | 1,03                 | 1,46                 | 1,29                 | 2,06                 | 2,37                 | 0,41               | 0,74               | 0,54               | 0,71               | 0,88               | 7,00            | 11,00           | 10,00           | 5,00            | 4,00            |
| Pacient 7 (M)  | 11,19                | 14,44                | 13,60                | 10,96                | 12,18                | 0,31                 | 0,33                 | 0,28                 | 0,36                 | 0,50                 | 0,19               | 0,22               | 0,35               | 0,33               | 0,53               | 36,00           | 44,00           | 49,00           | 30,00           | 24,00           |
| Pacient 8 (M)  | 10,50                | 15,58                | 16,46                | 9,49                 | 8,25                 | 1,25                 | 1,15                 | 1,15                 | 1,60                 | 1,30                 | 0,76               | 0,72               | 0,94               | 0,66               | 0,64               | 8,00            | 14,00           | 14,00           | 6,00            | 6,00            |
| Pacient 9 (M)  | 3,35                 | 6,32                 | 6,94                 | 4,63                 | 6,17                 | 1,26                 | 1,61                 | 1,55                 | 1,49                 | 1,73                 | 0,15               | 0,36               | 0,27               | 0,23               | 0,30               | 3,00            | 4,00            | 4,00            | 3,00            | 4,00            |
| Pacient 10 (M) | 9,22                 | 12,06                | 11,01                | 8,20                 | 6,60                 | 0,95                 | 1,05                 | 1,13                 | 1,43                 | 2,07                 | 0,45               | 0,63               | 0,66               | 0,66               | 0,77               | 10,00           | 11,00           | 10,00           | 6,00            | 3,00            |
| Pacient 11 (M) | 13,76                | 12,77                | 12,71                | 10,15                | 9,70                 | 0,94                 | 1,06                 | 0,72                 | 1,10                 | 1,65                 | 0,32               | 0,80               | 0,33               | 0,41               | 0,47               | 15,00           | 12,00           | 18,00           | 9,00            | 6,00            |
| Pacient 12 (M) | 1,77                 | 6,98                 | 8,88                 | 11,36                | 9,03                 | 0,39                 | 0,42                 | 0,57                 | 0,51                 | 0,28                 | 0,13               | 0,31               | 0,47               | 0,44               | 0,34               | 5,00            | 17,00           | 16,00           | 22,00           | 32,00           |
| Pacient 13 (F) | 17,73                | 17,26                | 13,66                | 11,73                | 7,38                 | 0,99                 | 0,85                 | 1,08                 | 2,16                 | 2,38                 | 0,23               | 0,59               | 0,54               | 1,14               | 0,79               | 18,00           | 20,00           | 13,00           | 5,00            | 3,00            |
| Pacient 14 (F) | 3,94                 | 4,75                 | 3,59                 | 3,62                 | 5,74                 | 1,75                 | 1,73                 | 2,02                 | 2,23                 | 1,50                 | 0,30               | 0,34               | 0,40               | 0,45               | 0,53               | 2,00            | 3,00            | 2,00            | 2,00            | 4,00            |
| Pacient 15 (F) | 5,12                 | 5,55                 | 11,43                | 7,32                 | 11,59                | 0,88                 | 0,60                 | 0,60                 | 0,80                 | 0,85                 | 0,83               | 0,57               | 1,05               | 0,57               | 0,71               | 6,00            | 9,00            | 19,00           | 9,00            | 14,00           |
| Pacient 16 (F) | 4,97                 | 10,99                | 7,27                 | 6,92                 | 7,52                 | 0,73                 | 1,44                 | 1,89                 | 1,69                 | 2,14                 | 0,18               | 0,66               | 0,57               | 0,68               | 0,64               | 7,00            | 8,00            | 4,00            | 4,00            | 4,00            |
| Pacient 17 (M) | 2,86                 | 6,65                 | 4,99                 | 4,54                 | 6,58                 | 0,27                 | 0,45                 | 0,48                 | 0,54                 | 0,56                 | 0,11               | 0,24               | 0,07               | 0,13               | 0,21               | 11,00           | 15,00           | 10,00           | 8,00            | 12,00           |
| Pacient 18 (M) | 13,95                | 23,54                | 20,47                | 16,68                | 8,74                 | 0,85                 | 0,99                 | 0,45                 | 0,56                 | 0,60                 | 0,36               | 0,50               | 0,31               | 0,52               | 0,23               | 16,00           | 24,00           | 45,00           | 30,00           | 15,00           |
| Pacient 19 (M) | 17,02                | 21,11                | 16,52                | 9,48                 | 6,21                 | 0,31                 | 0,65                 | 0,48                 | 0,54                 | 0,91                 | 0,42               | 0,46               | 0,44               | 0,38               | 0,39               | 55,00           | 32,00           | 34,00           | 18,00           | 7,00            |
| Pacient 20 (M) | 6,89                 | 6,37                 | 5,35                 | 5,66                 | 7,71                 | 0,45                 | 0,37                 | 0,55                 | 0,59                 | 0,70                 | 0,15               | 0,16               | 0,23               | 0,25               | 0,23               | 15,00           | 9,00            | 10,00           | 10,00           | 11,00           |
| Pacient 21 (F) | 6,05                 | 7,08                 | 7,25                 | 9,65                 | 11,19                | 0,94                 | 1,01                 | 0,67                 | 0,78                 | 0,78                 | 0,51               | 0,53               | 0,53               | 0,74               | 0,62               | 3,00            | 6,00            | 7,00            | 11,00           | 12,00           |
| Pacient 22 (F) | 6,00                 | 10,82                | 9,91                 | 10,78                | 11,93                | 0,91                 | 0,94                 | 1,42                 | 1,53                 | 1,94                 | 0,32               | 0,58               | 0,54               | 0,62               | 0,65               | 7,00            | 12,00           | 7,00            | 7,00            | 6,00            |

**Abbreviations:** M=male; F=female; NLR=Neutrophil-Lymphocyte Ratio

**Table S4:** The mean values of albumin, calcium, ionized calcium, hemoglobin and hematocrit of each patient during the monitoring period (day 0-4).

| Patient        | Albumin<br>Day 0 | Albumin<br>Day 1 | Albumin<br>Day 2 | Albumin<br>Day 3 | Albumin<br>Day 4 | Clacium<br>Day 0 | Calcium<br>Day 1 | Calcium<br>Day 2 | Calcium<br>Day 3 | Calcium<br>Day 4 | Ionized<br>Ca Day<br>0 | Ionized<br>Ca Day<br>1 | Ionized<br>Ca Day<br>2 | Ionized<br>Ca Day<br>3 | Ionized<br>Ca Day<br>4 | Hemoglobin<br>Day 0 | Hemoglobin<br>Day 1 | Hemoglobin<br>Day 2 | Hemoglobin<br>Day 3 | Hemoglobin<br>Day 4 | Hematocrit<br>Day 0 | Hematocrit<br>Day 1 | Hematocrit<br>Day 2 | Hematocrit<br>Day 3 | Hematocrit<br>Day 4 |
|----------------|------------------|------------------|------------------|------------------|------------------|------------------|------------------|------------------|------------------|------------------|------------------------|------------------------|------------------------|------------------------|------------------------|---------------------|---------------------|---------------------|---------------------|---------------------|---------------------|---------------------|---------------------|---------------------|---------------------|
| Pacient 1 (M)  | 36,30            | 32,25            | 33,60            | 33,77            | 32,44            | 2,31             | 2,24             | 2,21             | 2,22             | 2,21             | 1,18                   | 1,19                   | 1,22                   | 1,19                   | 1,16                   | 147,00              | 145,00              | 147,00              | 150,00              | 152,00              | 0,45                | 0,44                | 0,44                | 0,45                | 0,46                |
| Pacient 2 (M)  | 37,66            | 37,21            | 35,04            | 35,11            | 38,57            | 2,24             | 2,23             | 2,24             | 2,29             | 2,30             | 1,11                   | 1,20                   | 1,18                   | 1,22                   | 1,21                   | 154,00              | 149,00              | 147,00              | 150,00              | 152,00              | 0,47                | 0,46                | 0,45                | 0,47                | 0,47                |
| Pacient 3 (M)  | 35,93            | 36,41            | 35,69            | 34,71            | 35,08            | 2,14             | 2,24             | 2,12             | 2,19             | 2,26             | 1,19                   | 1,19                   | 1,14                   | 1,17                   | 1,23                   | 147,00              | 149,00              | 143,00              | 138,00              | 147,00              | 0,45                | 0,46                | 0,43                | 0,42                | 0,44                |
| Pacient 4 (M)  | 40,91            | 39,22            | 37,63            | 36,80            | 36,08            | 2,18             | 2,12             | 2,16             | 2,17             | 2,16             | 1,03                   | 1,12                   | 1,12                   | 1,15                   | 1,13                   | 143,00              | 138,00              | 142,00              | 145,00              | 139,00              | 0,44                | 0,43                | 0,43                | 0,44                | 0,42                |
| Pacient 5 (M)  | 33,90            | 32,08            | 33,62            | 33,91            | 33,47            | 1,95             | 1,88             | 2,01             | 2,04             | 2,07             | 1,02                   | 1,05                   | 1,08                   | 1,04                   | 1,09                   | 146,00              | 139,00              | 147,00              | 145,00              | 144,00              | 0,43                | 0,41                | 0,43                | 0,43                | 0,43                |
| Pacient 6 (M)  | 35,93            | 39,61            | 36,67            | 35,77            | 33,45            | 2,02             | 2,05             | 2,02             | 2,15             | 2,14             | 1,14                   | 1,12                   | 1,08                   | 1,19                   | 1,15                   | 136,00              | 136,00              | 132,00              | 133,00              | 129,00              | 0,41                | 0,41                | 0,41                | 0,41                | 0,40                |
| Pacient 7 (M)  | 27,98            | 26,82            | 26,49            | 26,64            | 25,38            | 1,92             | 1,94             | 1,88             | 1,83             | 1,90             | 1,02                   | 1,02                   | 1,04                   | 1,01                   | 1,06                   | 130,00              | 127,00              | 118,00              | 118,00              | 119,00              | 0,39                | 0,38                | 0,36                | 0,36                | 0,37                |
| Pacient 8 (M)  | 38,12            | 36,94            | 34,75            | 35,52            | 32,83            | 2,09             | 2,17             | 2,28             | 2,22             | 2,26             | 1,14                   | 1,14                   | 1,21                   | 1,18                   | 1,24                   | 132,00              | 148,00              | 143,00              | 151,00              | 149,00              | 0,40                | 0,44                | 0,43                | 0,45                | 0,45                |
| Pacient 9 (M)  | 39,34            | 37,47            | 37,20            | 39,30            | 39,33            | 2,17             | 2,22             | 2,22             | 2,23             | 2,20             | 1,10                   | 1,14                   | 1,15                   | 1,16                   | 1,08                   | 139,00              | 140,00              | 141,00              | 146,00              | 148,00              | 0,42                | 0,43                | 0,44                | 0,45                | 0,45                |
| Pacient 10 (M) | 28,09            | 27,66            | 25,08            | 24,74            | 25,53            | 2,17             | 2,24             | 2,12             | 2,13             | 2,12             | 1,25                   | 1,25                   | 1,21                   | 1,25                   | 1,21                   | 138,00              | 142,00              | 131,00              | 130,00              | 131,00              | 0,42                | 0,43                | 0,40                | 0,40                | 0,40                |
| Pacient 11 (M) | 41,64            | 34,94            | 35,68            | 33,61            | 31,95            | 2,30             | 2,21             | 2,12             | 2,21             | 2,30             | 1,16                   | 1,18                   | 1,12                   | 1,20                   | 1,07                   | 171,00              | 154,00              | 152,00              | 152,00              | 155,00              | 0,52                | 0,48                | 0,47                | 0,47                | 0,49                |
| Pacient 12 (M) | 31,16            | 28,98            | 30,87            | 28,99            | 28,61            | 1,96             | 1,86             | 1,93             | 2,00             | 2,03             | 1,07                   | 1,10                   | 1,12                   | 1,13                   | 1,25                   | 102,00              | 93,00               | 93,00               | 97,00               | 94,00               | 0,32                | 0,29                | 0,29                | 0,31                | 0,30                |
| Pacient 13 (F) | 31,35            | 31,17            | 31,00            | 32,50            | 33,78            | 2,03             | 2,10             | 2,07             | 2,08             | 2,11             | 1,09                   | 1,18                   | 1,07                   | 1,15                   | 1,14                   | 108,00              | 102,00              | 100,00              | 108,00              | 103,00              | 0,33                | 0,31                | 0,31                | 0,33                | 0,32                |
| Pacient 14 (F) | 38,13            | 31,55            | 32,02            | 34,17            | 32,50            | 2,17             | 2,22             | 2,02             | 2,13             | 2,23             | 1,14                   | 1,13                   | 1,12                   | 1,15                   | 1,16                   | 133,00              | 133,00              | 115,00              | 119,00              | 120,00              | 0,41                | 0,41                | 0,36                | 0,37                | 0,38                |
| Pacient 15 (F) | 30,38            | 33,82            | 33,55            | 32,35            | 34,16            | 2,27             | 2,47             | 2,62             | 2,59             | 2,60             | 1,35                   | 1,35                   | 1,46                   | 1,41                   | 1,49                   | 137,00              | 152,00              | 145,00              | 139,00              | 136,00              | 0,42                | 0,47                | 0,43                | 0,43                | 0,41                |
| Pacient 16 (F) | 33,93            | 34,05            | 30,87            | 30,32            | 31,35            | 2,22             | 2,24             | 2,09             | 2,17             | 2,06             | 1,20                   | 1,22                   | 1,18                   | 1,20                   | 1,14                   | 142,00              | 137,00              | 125,00              | 126,00              | 128,00              | 0,44                | 0,43                | 0,39                | 0,40                | 0,39                |
| Pacient 17 (M) | 31,53            | 30,00            | 28,80            | 30,77            | 31,29            | 2,02             | 2,11             | 2,01             | 2,19             | 2,19             | 1,15                   | 1,15                   | 1,15                   | 1,23                   | 1,26                   | 117,00              | 118,00              | 100,00              | 105,00              | 106,00              | 0,36                | 0,36                | 0,30                | 0,32                | 0,32                |
| Pacient 18 (M) | 26,45            | 29,10            | 23,50            | 26,62            | 24,18            | 1,88             | 2,01             | 1,93             | 2,04             | 1,93             | 1,14                   | 1,16                   | 1,17                   | 1,22                   | 1,13                   | 145,00              | 153,00              | 138,00              | 144,00              | 139,00              | 0,45                | 0,45                | 0,42                | 0,43                | 0,42                |
| Pacient 19 (M) | 35,57            | 29,10            | 30,21            | 25,18            | 24,29            | 2,68             | 2,18             | 2,55             | 2,22             | 2,24             | 1,35                   | 1,30                   | 1,40                   | 1,30                   | 1,33                   | 151,00              | 137,00              | 140,00              | 127,00              | 122,00              | 0,45                | 0,40                | 0,42                | 0,38                | 0,37                |
| Pacient 20 (M) | 34,30            | 29,17            | 29,76            | 29,26            | 29,85            | 1,96             | 2,04             | 2,03             | 2,07             | 2,05             | 1,05                   | 1,09                   | 1,08                   | 1,11                   | 1,09                   | 148,00              | 135,00              | 141,00              | 148,00              | 150,00              | 0,44                | 0,41                | 0,43                | 0,45                | 0,45                |
| Pacient 21 (F) | 44,10            | 35,19            | 32,50            | 30,48            | 31,72            | 2,20             | 2,16             | 2,15             | 2,20             | 2,16             | 1,14                   | 1,14                   | 1,20                   | 1,20                   | 1,19                   | 153,00              | 140,00              | 136,00              | 134,00              | 139,00              | 0,47                | 0,43                | 0,41                | 0,41                | 0,42                |
| Pacient 22 (F) | 32,27            | 30,45            | 31,43            | 31,05            | 33,11            | 1,96             | 2,10             | 2,03             | 2,03             | 2,09             | 0,99                   | 1,09                   | 1,10                   | 1,12                   | 1,14                   | 134,00              | 138,00              | 132,00              | 135,00              | 141,00              | 0,42                | 0,42                | 0,41                | 0,42                | 0,43                |

Abbreviations:M=male; F=female

**Table S5:** The mean values of selected kidney and liver markers of each patient during the monitoring period (day 0-4).

| Patient           | Urea<br>Day 0 | Urea<br>Day 1 | Urea<br>Day 2 | Urea<br>Day 3 | Urea<br>Day 4 | Creatinine<br>Day 0 | Creatinine<br>Day 1 | Creatinine<br>Day 2 | Creatinine<br>Day 3 | Creatinine<br>Day 4 | ALT Day<br>0 | ALT Day<br>1 | ALT Day<br>2 | ALT Day<br>3 | ALT Day<br>4 | ALP Day<br>0 | ALP Day<br>1 | ALP Day<br>2 | ALP Day<br>3 | ALP Day<br>4 |
|-------------------|---------------|---------------|---------------|---------------|---------------|---------------------|---------------------|---------------------|---------------------|---------------------|--------------|--------------|--------------|--------------|--------------|--------------|--------------|--------------|--------------|--------------|
| Pacient 1<br>(M)  | 5,31          | 7,49          | 8,15          | 7,83          | 7,89          | 94,30               | 90,40               | 78,90               | 77,90               | 86,30               | 0,96         | 0,94         | 1,69         | 4,40         | 4,63         | 1,64         | 1,46         | 1,82         | 3,18         | 2,79         |
| Pacient 2<br>(M)  | 4,21          | 5,87          | 7,94          | 7,15          | 6,67          | 70,70               | 70,90               | 71,60               | 72,60               | 66,10               | 1,62         | 1,62         | 1,70         | 1,89         | 1,67         | 1,00         | 0,96         | 0,88         | 0,92         | 0,98         |
| Pacient 3<br>(M)  | 3,58          | 3,97          | 5,10          | 4,93          | 4,82          | 74,60               | 75,40               | 77,60               | 78,00               | 76,10               | 0,67         | 1,03         | 1,90         | 2,21         | 2,45         | 1,05         | 1,44         | 1,85         | 2,18         | 2,34         |
| Pacient 4<br>(M)  | 5,22          | 6,65          | 7,62          | 8,17          | 7,38          | 79,70               | 69,70               | 67,20               | 68,50               | 61,70               | 6,33         | 4,25         | 4,70         | 2,74         | 4,25         | 1,36         | 1,35         | 1,47         | 1,75         | 1,90         |
| Pacient 5<br>(M)  | 3,05          | 3,94          | 4,77          | 4,86          | 5,32          | 57,10               | 50,60               | 55,80               | 64,00               | 71,90               | 8,61         | 7,34         | 9,30         | 7,85         | 7,40         | 2,92         | 2,59         | 2,69         | 2,32         | 2,26         |
| Pacient 6<br>(M)  | 5,37          | 4,86          | 5,24          | 7,07          | 7,91          | 73,20               | 73,30               | 75,70               | 81,90               | 93,20               | 0,72         | 1,49         | 1,10         | 1,24         | 2,27         | 0,83         | 0,95         | 0,99         | 1,15         | 1,37         |
| Pacient 7<br>(M)  | 11,68         | 18,42         | 15,62         | 12,61         | 10,15         | 118,90              | 127,40              | 97,80               | 83,10               | 75,10               | 1,79         | 1,26         | 0,95         | 0,62         | 0,59         | 2,78         | 2,40         | 2,10         | 1,87         | 1,58         |
| Pacient 8<br>(M)  | 2,67          | 3,17          | 3,69          | 4,92          | 5,49          | 102,80              | 87,40               | 91,10               | 86,90               | 87,90               | 0,63         | 0,60         | 0,72         | 1,24         | 1,26         | 0,77         | 0,81         | 0,79         | 0,77         | 0,74         |
| Pacient 9<br>(M)  | 6,59          | 7,13          | 7,61          | 8,62          | 9,71          | 91,00               | 74,90               | 78,20               | 80,90               | 85,60               | 0,72         | 0,58         | 0,53         | 0,67         | 0,71         | 2,40         | 2,16         | 2,08         | 2,07         | 1,95         |
| Pacient 10<br>(M) | 9,44          | 10,75         | 11,60         | 10,23         | 9,65          | 94,40               | 85,10               | 85,30               | 76,80               | 79,20               | 0,75         | 0,85         | 0,40         | 1,49         | 1,59         | 1,52         | 1,44         | 1,18         | 1,17         | 1,18         |
| Pacient 11<br>(M) | 22,40         | 12,38         | 8,91          | 8,20          | 7,18          | 117,70              | 77,20               | 60,20               | 67,00               | 61,60               | 1,30         | 1,47         | 1,00         | 0,97         | 1,04         | 3,28         | 2,49         | 2,18         | 2,07         | 1,93         |
| Pacient 12<br>(M) | 22,80         | 21,00         | 14,99         | 10,77         | 14,65         | 265,50              | 172,30              | 163,00              | 143,90              | 161,00              | 0,28         | 0,28         | 0,28         | 0,34         | 0,51         | 1,16         | 1,14         | 1,13         | 1,24         | 1,37         |
| Pacient 13<br>(F) | 10,36         | 8,04          | 9,64          | 8,30          | 6,81          | 105,20              | 73,60               | 83,70               | 80,10               | 75,20               | 0,38         | 0,74         | 1,50         | 1,72         | 1,07         | 0,92         | 1,16         | 1,35         | 1,63         | 1,63         |
| Pacient 14<br>(F) | 6,64          | 6,29          | 4,48          | 3,69          | 4,56          | 98,90               | 78,10               | 92,00               | 78,40               | 82,70               | 1,90         | 3,05         | 3,30         | 5,27         | 8,18         | 4,05         | 4,73         | 3,60         | 5,17         | 7,31         |
| Pacient 15<br>(F) | 5,54          | 9,92          | 17,29         | 25,97         | 32,23         | 78,20               | 102,40              | 108,90              | 146,60              | 142,70              | 1,05         | 4,09         | 3,09         | 2,69         | 2,54         | 1,49         | 2,16         | 2,13         | 2,40         | 2,41         |
| Pacient 16<br>(F) | 5,64          | 6,83          | 7,47          | 7,25          | 5,92          | 58,70               | 61,10               | 66,20               | 59,90               | 53,60               | 0,43         | 0,63         | 0,57         | 0,61         | 0,96         | 1,50         | 1,34         | 1,17         | 1,11         | 1,12         |
| Pacient 17<br>(M) | 13,25         | 17,79         | 16,75         | 16,12         | 16,53         | 148,70              | 155,80              | 146,50              | 132,60              | 137,00              | 0,39         | 0,37         | 0,33         | 0,36         | 0,20         | 3,24         | 2,77         | 2,65         | 2,79         | 2,70         |
| Pacient 18<br>(M) | 28,15         | 27,29         | 19,63         | 14,32         | 13,08         | 193,00              | 141,20              | 93,40               | 75,80               | 86,90               | 0,67         | 0,56         | 0,56         | 1,47         | 1,35         | 1,21         | 1,36         | 1,61         | 1,63         | 1,49         |
| Pacient 19<br>(M) | 29,81         | 23,48         | 19,89         | 11,63         | 8,44          | 200,60              | 124,70              | 115,10              | 83,60               | 79,30               | 0,37         | 0,29         | 0,31         | 0,31         | 0,37         | 1,79         | 1,38         | 1,56         | 1,45         | 1,45         |
| Pacient 20<br>(M) | 10,49         | 11,80         | 9,10          | 9,08          | 8,77          | 102,50              | 74,60               | 74,40               | 72,60               | 79,40               | 0,41         | 0,38         | 0,44         | 0,57         | 0,31         | 1,60         | 1,44         | 1,78         | 1,68         | 1,47         |
| Pacient 21<br>(F) | 5,82          | 6,03          | 7,04          | 6,27          | 6,70          | 73,00               | 53,80               | 75,60               | 60,50               | 63,80               | 0,96         | 0,68         | 0,81         | 1,26         | 0,85         | 1,50         | 1,73         | 1,79         | 2,18         | 2,00         |
| Pacient 22<br>(F) | 7,64          | 7,54          | 8,79          | 7,40          | 7,17          | 75,00               | 89,60               | 89,70               | 93,70               | 80,20               | 0,60         | 0,51         | 1,27         | 2,01         | 2,24         | 1,02         | 1,15         | 1,26         | 1,24         | 1,24         |

Abbreviations: M=male; F=female; ALT=Alanine transaminase; ALP=Alkaline phosphatase
