# Supplementary material for: Serum 25-hydroxyvitamin D Concentration Significantly Decreases in Patients with COVID-19 Pneumonia during the First 48 Hours after Hospital Admission
Source: MDPI journal article supplement (doi:10.3390/nu14122362), 2022-06-07
Supplement: s1 [file s1]

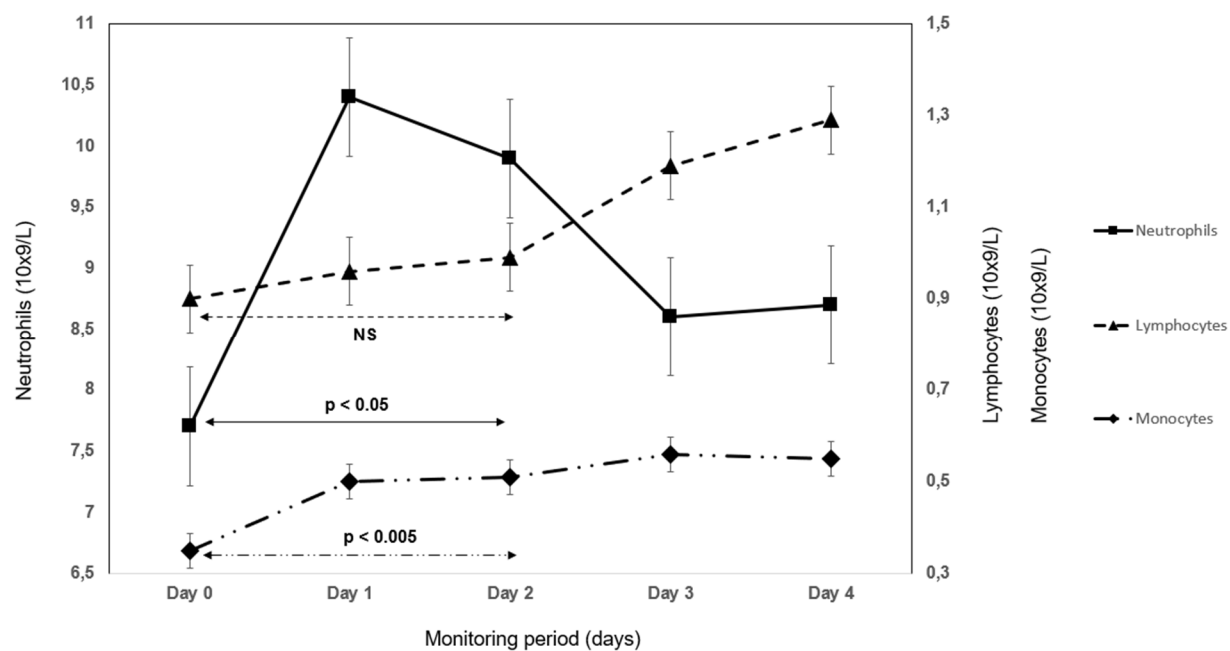

**Figure S3:** The changes of mean values of the neutrophils, lymphocytes, and monocytes during the monitoring period. P values of the change during the first 48 hours are displayed.

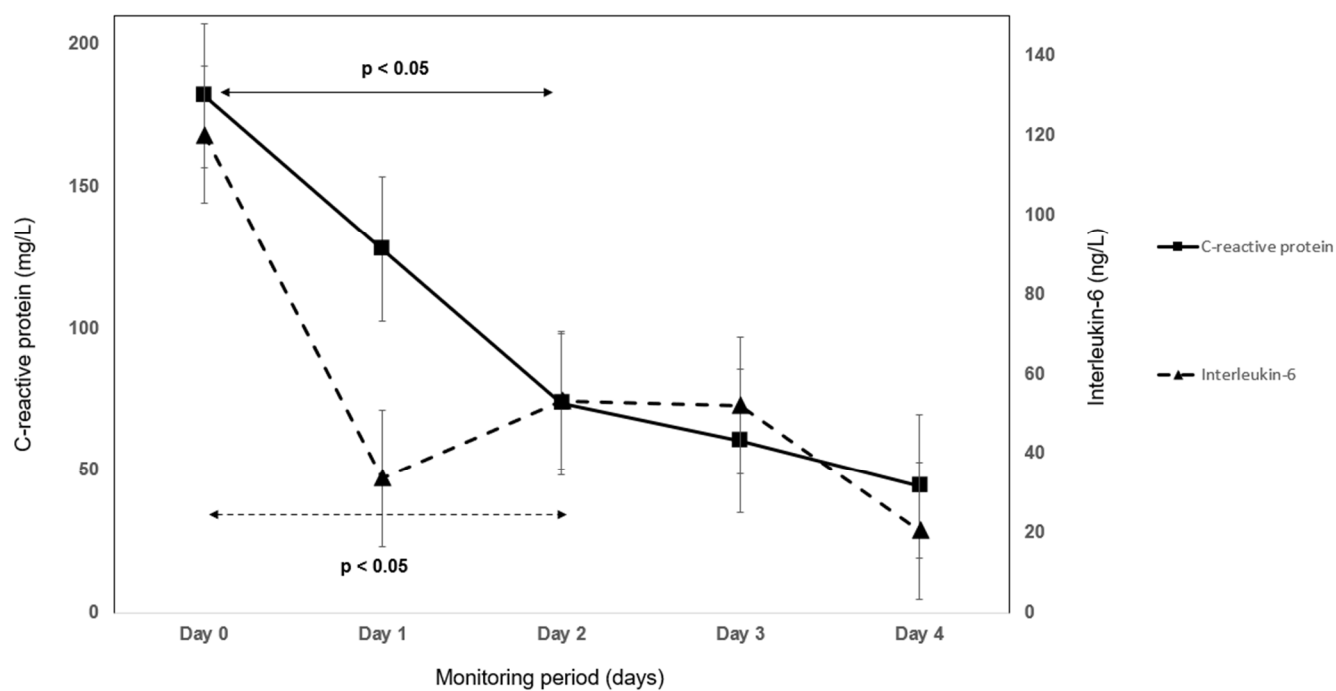

**Figure S2:** The changes of mean values of C-reactive protein and Interleukin-6 during the monitoring period. P values of the change during the first 48 hours are displayed.

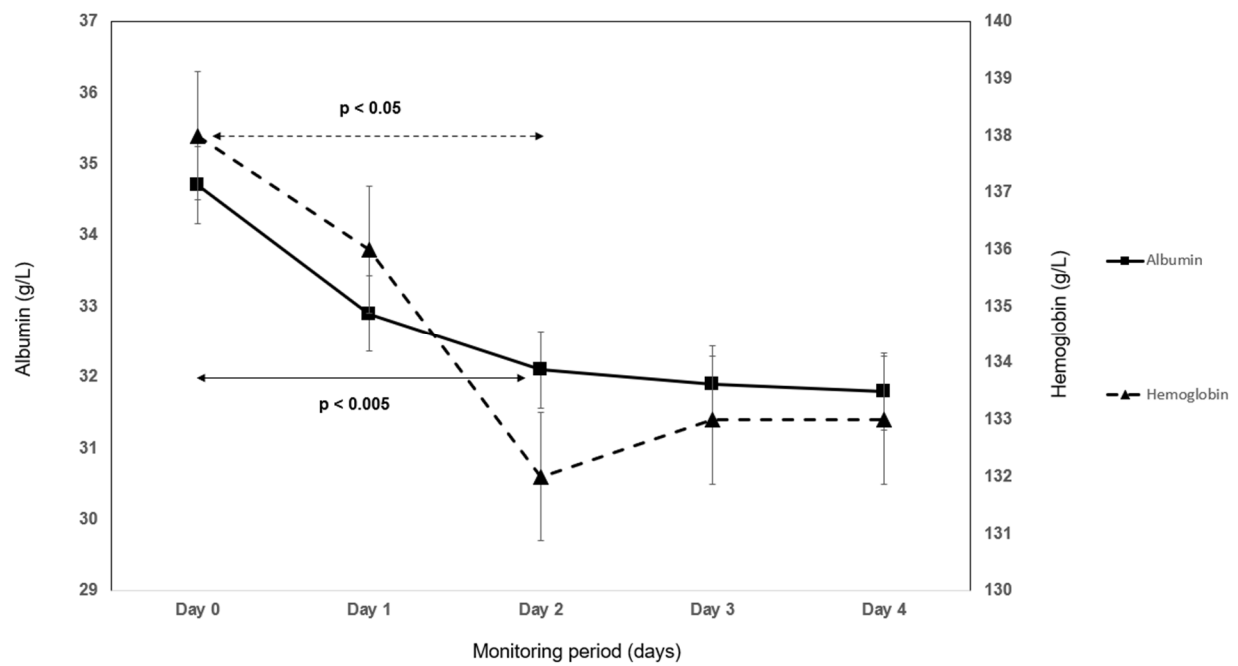

**Figure S1:** The changes of mean values of albumin and hemoglobin during the monitoring period. P values of the change during the first 48 hours are displayed.
